1 Functional metabolic phenotyping of human pancreatic ductal adenocarcinoma

2

3 Short title: Metabolic phenotyping of PDAC

4

5 Irina Heid<sup>\*1</sup>, Sinan Karakaya<sup>\*2,3</sup>, Corinna Münch<sup>\*2,3</sup>, Smiths S. Lueong<sup>2,3</sup>, Alina M. Winkelkotte  
6 <sup>2,3</sup>, Sven T. Liffers<sup>2,3</sup>, Laura Godfrey<sup>2,3</sup>, Phyllis FY Cheung<sup>2,3</sup>, Konstatinos Savvatakis<sup>2,3</sup>,  
7 Geoffrey J. Topping<sup>4</sup>, Florian Englert<sup>1</sup>, Lukas Kritznner<sup>1</sup>, Martin Grashei<sup>4</sup>, Thomas Kunzke<sup>5</sup>, Na  
8 Sun<sup>5</sup>, Axel Walch<sup>5</sup>, Andrea Tannapfel<sup>6</sup>, Richard Viebahn<sup>7</sup>, Heiner Wolters<sup>8</sup>, Waldemar Uhl<sup>9</sup>,  
9 Deepak Vangala<sup>10</sup>, Esther M.M. Smeets<sup>11</sup>, Erik H.J.G. Aarntzen<sup>11</sup>, Daniel Rauh<sup>12</sup>, Jörg D.  
10 Hoheisel<sup>13</sup>, Doris Hellerschmied<sup>14</sup>, Stephan A. Hahn<sup>15</sup>, Franz Schilling<sup>4</sup>, Rickmer Braren<sup>#,1,16</sup>,  
11 Marija Trajkovic-Arsic<sup>#,2,3</sup> and Jens T. Siveke<sup>#,2,3</sup>

12

13 <sup>1</sup> Technical University of Munich, School of Medicine; Institute of Diagnostic and Interventional  
14 Radiology, Klinikum rechts der Isar, Munich, Germany;

15 <sup>2</sup> Bridge Institute of Experimental Tumor Therapy, West German Cancer Center, University  
16 Hospital Essen, Essen, Germany;

17 <sup>3</sup> Division of Solid Tumor Translational Oncology, German Cancer Consortium (DKTK, partner  
18 site Essen) and German Cancer Research Center, DKFZ, Heidelberg, Germany;

19 <sup>4</sup> Department of Nuclear Medicine, School of Medicine, Klinikum rechts der Isar, Technical  
20 University of Munich, Munich, Germany;

21 <sup>5</sup> Research Unit Analytical Pathology, Helmholtz Zentrum Munich, Munich, Germany;

22 <sup>6</sup> Institute of Pathology, Ruhr University of Bochum, Bochum, Germany;

23 <sup>7</sup> Ruhr University Bochum, Knappschaftskrankenhaus, Department of Surgery, Bochum,  
24 Germany;

25 <sup>8</sup> Department of Visceral and General Surgery, St. Josef Hospital, Dortmund, Germany;

26 <sup>9</sup> Clinic for General and Visceral Surgery, St. Josef-Hospital, Ruhr-University Bochum,  
27 Bochum, Germany;

28 <sup>10</sup> Ruhr University Bochum, Department of Medicine, University Klinik  
29 Knappschaftskrankenhaus Bochum GmbH, Germany;

30 <sup>11</sup> Medical Imaging, Radboud University Medical Center, Nijmegen, The Netherlands

31 <sup>12</sup> Faculty of Chemistry and Chemical Biology, TU Dortmund University, Dortmund, Germany  
32 and Drug Discovery Hub Dortmund (DDHD) am Zentrum für Integrierte Wirkstofforschung  
33 (ZIW), Dortmund, Germany.

34 <sup>13</sup> Division of Functional Genome Analysis, German Cancer Research Center, DKFZ,  
35 Heidelberg, Germany

36 <sup>14</sup> Faculty of Biology, Center of Medical Biotechnology, University Duisburg-Essen, Essen,  
37 Germany

38 <sup>15</sup> Ruhr University Bochum, Faculty of Medicine, Department of Molecular GI Oncology,  
39 44780 Bochum, Germany

40 <sup>16</sup> German Cancer Consortium (DKTK, partner Site Munich), Munich, Germany

41

42 <sup>##</sup>equally contributing authors

43

44 Key words: metabolism, fatty acid oxidation, PDAC, lactate, molecular subtype, hyperpolarized  
45 magnetic resonance spectroscopy

46

47 Corresponding authors:

48 Marija Trajkovic-Arsic: [m.trajkovic-arsic@dkfz.de](mailto:m.trajkovic-arsic@dkfz.de)

49 Jens T. Siveke: [j.siveke@dkfz.de](mailto:j.siveke@dkfz.de)

50 Bridge Institute of Experimental Tumor Therapy

51 West German Cancer Center

52 University Hospital Essen, Hufelandstr. 55, 45147 Essen, Germany

53

54 **Financial support:**

55 This work was supported by the grant of Wilhelm-Sander Stiftung (grant number:  
56 2019.008.1) to M.T-A and J.S and the German Research Foundation (DFG) within the SFB-  
57 Initiative 824 (collaborative research center), "Imaging for Selection, Monitoring and  
58 Individualization of Cancer Therapies" (SFB824; projects C4, C6, Z2 and A7); J.T.S is  
59 supported by the German Cancer Consortium (DKTK), SI1549/3-1 (Clinical Research Unit  
60 KFO337) and SI1549/4-1; the Deutsche Krebshilfe (German Cancer Aid) through  
61 #70112505, PIPAC and #70113834, PREDICT-PACA; P.FY.C is supported by the DFG (CH  
62 2320/2-3). D.H. is supported by the Kovalevskaja Award by the Alexander von Humboldt  
63 Foundation.

64

65 **Declaration of interest:**

66 JTS reports the following disclosures: Bristol Myers Squibb, Celgene, Roche (Research  
67 Funding); AstraZeneca, Bayer, Bristol Myers Squibb, Celgene, Immunocore, Novartis,  
68 Roche, Shire (Consulting or advisory role); AstraZeneca, Aurikamed, Baxalta, Bristol Myers  
69 Squibb, Celgene, Falk Foundation, iomedico, Immunocore, Novartis, Roche, Shire  
70 (honoraria); minor equity in iTheranostics and Pharma15 (< 3%) and member of the Board of  
71 Directors for Pharma15, all outside the submitted work. D.R. received consultant and lecture  
72 fees from Astra-Zeneca, Merck-Serono, Takeda, Pfizer, Novartis, Boehringer Ingelheim,  
73 Sanofi-Aventis and BMS. D.R. is a founder and consultants of PearlRiver Bio GmbH and  
74 shareholder of Centessa Pharmaceuticals plc. DV reports :Bristol Myer Squibb (Advisory

75 Board), Roche and Falk Foundation (Speaker's honoraria), Gilead and Celgene (Travel  
76 support and Congress registration fees).

77

78

79 **Abstract**

80 Pancreatic Ductal Adenocarcinoma (PDAC) lacks targeted treatment options. Although  
81 subtypes with transcriptome-based distinct lineage and differentiation features have been  
82 identified, deduced clinically actionable targets remain elusive. We here investigate functional  
83 metabolic features of the classical and QM (quasi-mesenchymal)/basal-like PDAC subtypes  
84 potentially exploitable for non-invasive subtype differentiation and therapeutic intervention.

85 A collection of human PDAC cell lines, primary patient derived cells (PDC), patient derived  
86 xenografts (PDX) and patient PDAC samples were transcriptionally stratified into the classical  
87 and QM subtype. Functional metabolic analyses including targeted and non-targeted  
88 metabolite profiling (matrix-assisted laser desorption/ionization mass spectrometry imaging  
89 (MALDI-MSI)), Seahorse metabolic flux assays and metabolic drug targeting were performed.  
90 Hyperpolarized  $^{13}\text{C}$ -magnetic resonance spectroscopy (HP-MRS) of PDAC xenografts was  
91 used for *in vivo* detection of intra-tumoral  $[1-^{13}\text{C}]$ pyruvate and  $[1-^{13}\text{C}]$ lactate metabolism.

92 We identified glycolysis and lipid metabolism/fatty acid oxidation as transcriptionally preserved  
93 metabolic pathways in QM and classical PDAC subtype respectively. However, these  
94 metabolic cues were not unambiguously functionally linked to one subtype. Striking functional  
95 metabolic heterogeneity was observed especially in primary patient derived cells with only  
96 individual samples representing high dependence on glycolysis or mitochondrial oxidation. Of  
97 note, QM cells actively use the glycolytic product lactate as oxidative mitochondrial fuel. Using  
98 HP-MRS, we were able to non-invasively differentiate glycolytic tumor xenografts with high  
99 intratumoral  $[1-^{13}\text{C}]$ pyruvate to  $[1-^{13}\text{C}]$ lactate conversion *in vivo*.

100 Although PDAC transcriptomes indicate molecular subtype-associated distinct metabolic  
101 pathways, we found substantial functional metabolic heterogeneity independent of the  
102 molecular subtype. Non-invasive identification of highly glycolytic tumors by  $[1-^{13}\text{C}]$   
103  $^{13}\text{C}]$ pyruvate/lactate HP-MRS support individualized metabolic targeting approaches.

104

## 105 **Introduction**

106 Despite enormous research efforts in the last 50 years, pancreatic ductal adenocarcinoma  
107 (PDAC) remains a fatal disease with marginal clinical advancement [Aung et al., 2018].  
108 Although the oncogenic drivers as well as transcriptional and molecular profiles of PDAC have  
109 been studied in great detail [Chan-Seng-Yue et al., 2020; Moffitt et al., 2015; Waddell et al.,  
110 2015], effective targeting strategies remain scarce. Sequencing efforts in large patient cohorts  
111 have identified distinct molecular PDAC subtypes with two dominant lineages:  
112 classical/pancreatic progenitor and quasi-mesenchymal (QM) /squamous/basal-like [Aung et  
113 al., 2018; Bailey et al., 2016; Cancer Genome Atlas Research Network. Electronic address  
114 and Cancer Genome Atlas Research, 2017; Collisson et al., 2011]. QM PDACs are associated  
115 with shorter median survival and resistance to first-line chemotherapy with FOLFIRINOX [Aung  
116 et al., 2018]. Yet, which cancer cell features contribute to the aggressive and therapy-resistant  
117 phenotype phenotype remains unknown.

118 Metabolic plasticity, i.e. an individual cells ability to use different metabolic pathways in  
119 dependence of alternating growth conditions including oxygen and nutrient availability has  
120 been implicated as a major cause of therapy resistance in cancers [DeBerardinis and Chandel,  
121 2016]. This metabolic plasticity allows PDAC cells not only to adapt but to thrive on particularly  
122 scarce conditions of hypoxia and nutrient limitations [Biancur and Kimmelman, 2018] typically  
123 observed in PDAC. Recent transcriptional metabolic profiling of 33 cancer entities identified  
124 seven metabolic super-pathways that are selectively altered in specific cancer subpopulations  
125 and dramatically influence sensitivity to therapy. Cancers with upregulated gene signatures for  
126 carbohydrate, nucleotide and vitamin/cofactor metabolism show worse prognosis than those  
127 with enhanced lipid metabolism [Peng et al., 2018]. In PDAC, metabolic transcripts involved in  
128 glycolysis and cholesterol biosynthesis are associated with the classical and QM subtypes,  
129 respectively [Karasinska et al., 2020]. However, functional evidence that these pathways are  
130 indeed significantly operable in defined PDAC subtypes and thus therapeutically targetable  
131 are still largely missing.

132 In this work, we analyzed metabolic transcripts present in the classical and QM PDAC  
133 subtypes in a large collection of samples reaching from long-term cultured PDAC cell lines to  
134 patient-derived primary model systems. We address to which extent are those transcriptomic  
135 signatures functionally mirrored and whether differences in the metabolic phenotype between  
136 subtypes allows non-invasive subtype identification. We observed strong heterogeneity in the  
137 metabolic behavior especially in patient-derived models and were able to *in vivo* non-invasively  
138 detect highly glycolytic PDACs based on high conversion of [1-<sup>13</sup>C]pyruvate to [1-<sup>13</sup>C]lactate  
139 and vice-versa by HP-MRS. Our work opens a perspective for a non-invasive monitoring of  
140 personalized metabolic targeting approaches.

141

142 **Results**

143 ***Glycolysis and lipid metabolic transcripts are preserved in the classical and QM PDAC***  
144 ***subtypes***

145 To analyze which metabolic features are associated with molecular PDAC subtypes, we first  
146 performed transcriptome-based molecular subtyping in multiple preclinical and clinical  
147 samples. RNA was isolated from conventional PDAC cell lines (n=8), patient derived  
148 xenografts (PDX, n=34) and primary patient derived cells (PDC, n=11) and RNA-seq or  
149 Microarray analysis was performed. Transcriptomes from bulk tissue of 204 PDAC samples  
150 from previously published resource was utilized (E-MTAB-1791).

151 For tumor subtype determination, we used publicly available transcriptionally subtyped PDAC  
152 cohorts (PDAC cell lines (GSE21654 [Maupin et al., 2010]) PDAC xenograft (E-MTAB-4029  
153 [Noll et al., 2016]) and bulk PDAC tissue (GSE16515 and GSE15471 [Pei et al., 2009] [Badea  
154 et al., 2008]) for benchmarking. After that, patient PDAC samples, PDX cohort and PDC  
155 samples were stratified to QM and classical group and gene set enrichment analysis (GSEA)  
156 was performed. In the PDAC patient sample cohort (204 samples), 88 were classified as  
157 classical and 116 as QM subtype. Samples clustering to the QM subtype presented significant  
158 enrichment of selected QM and squamous subtype assigner gene sets previously described  
159 [Bailey et al., 2016; Collisson et al., 2011] (figure 1b; supplementary table 1) supporting correct  
160 subtype assignment.

161 In the PDX cohort, 22 classical and 12 QM tumors were identified and 6 classical and 5 QM  
162 among 11 PDCs. The 8 PDAC cell lines used in this study were previously classified as QM  
163 (KP4, PSN1, MIAPaca2, PaTu8988T) and classical (PaTu8988S, HUPT4, HPAFII, HPAC)  
164 [Daemen et al., 2015]. We analyzed gene expression of Vimentin (*VIM*) and E-cadherin  
165 (*CDH1*) as markers of mesenchymal and epithelial status respectively. QM PDAC cell lines  
166 presented high *VIM* and low *CDH1* gene expression as typical for mesenchymal feature  
167 enrichment. Classical PDAC cell lines presented higher *CDH1* and lower *VIM* expression  
168 (supplementary figure 1a). *VIM* and *CDH1* expression correlated well with the subtype of the  
169 PDCs as well (supplementary figure 1b).

170 After classification, QM and classical groups were compared by GSEA for HALLMARK,  
171 REACTOME and KEGG collections in all datasets. A full list of all enriched gene sets with  
172 respective Normalized Enrichment Score (NES) and False Discovery Rate (FDR) values is  
173 given in supplementary table 2. As expected for the mesenchymal phenotype, enrichment of  
174 epithelial-to-mesenchymal transition (EMT) gene set was observed in the QM group in PDX,  
175 PDC and patient PDAC samples (figure 1c). Analysis of metabolic transcripts revealed a  
176 remarkable stability of subtype-typical metabolic pathways throughout different models (figure  
177 1c). Transcripts involved in lipid metabolism (glycerophospholipid, sphingolipid, glycerolipid,  
178 glycolipid) as well as cholesterol metabolism were generally enriched in classical samples. In

179 PDX and patient PDAC samples of the classical subtype, the fatty acid (FA) metabolism gene  
180 set was also strongly enriched, suggesting not only structural but also active metabolic role of  
181 lipids in the classical subtype. Therefore, we next analyzed a generated fatty acid oxidation  
182 gene set containing 14 genes involved exclusively in the mitochondrial beta oxidation (FAO1)  
183 (supplementary table 3). This gene set was also significantly enriched in the classical patient  
184 PDAC samples (Figure 1d).

185 In QM samples, transcripts involved in glycolysis and hypoxia were preserved (figure 1c). The  
186 hypoxia gene set was enriched in QM bulk PDAC tissue, PDX and PDC data sets, even though  
187 PDC cells were cultured under common laboratory normoxic conditions. Glycolysis/glucose  
188 metabolism as well as MYC-targets gene sets were also enriched in the QM patient PDAC  
189 samples, PDX and PDAC cell lines datasets. Interestingly, the glycolysis gene set was not  
190 enriched in the QM PDCs, possibly due to low sample numbers but also suggesting no  
191 unambiguous assignment of glycolytic genes to the QM subtype at least in PDCs. In summary,  
192 we observed strong transcriptional association of classical and QM subtypes with lipid/FA  
193 metabolism and glycolysis respectively.

194

#### 195 ***Classical and QM PDACs differ in lipid metabolism***

196 To address whether the identified metabolic transcripts are effectively translated into active  
197 lipid and glucose metabolism in the classical and QM subtype respectively, we first analyzed  
198 distribution of structural lipids, energy storing lipids and free fatty acid in PDAC cell lines and  
199 primary PDCs.

200 Targeted metabolite profiling revealed enrichment of different structural lipids (sphingomyelins,  
201 lysophosphatidylcholines, phosphatidylcholines) in the classical PDAC cell lines (figure 2a,  
202 supplementary table 4) similar to what was previously described [Daemen et al., 2015]. In  
203 PDCs, a more heterogeneous distribution pattern was observed with generally higher  
204 accumulation of some structural lipids in the classical PDCs, however not as pronounced as  
205 in PDAC cell lines (figure 2a). These observations may hint for differences in the management  
206 of structural lipids in classical and QM subtypes.

207 Next to structural lipids, storage lipids and FA are key branches of lipid metabolism. We thus  
208 investigated their distribution in 8 PDAC cell lines and 7 selected PDCs. OilRedO staining for  
209 storage lipids (neutral lipids, triacylglycerols) revealed accumulation of lipid droplets in the QM  
210 lines PSN1, MIAPaca2 and Kp4 and in one classical line (PaTu8988S) (figure 2b). In contrast,  
211 lipid droplets were not detected in the classical cell lines HUPT4, HPAFII and HPAC nor in  
212 PaTu8988T cells. In primary PDCs, only PDC69 (QM) presented very high numbers of  
213 intracellular lipid droplets present in the majority of the cells, whereas scarce positive cells  
214 were found in PDC57 (QM). OliRedO positive cells were readily observed in classical PDC70  
215 (30-40% of cells). In classical PDC58, PDC59 and PDC89 cells, OilRedO positive cells were

216 in general not detected with only very few positive cells found in PDC89 (figure 2b). In terms  
217 of FA distribution, all 4 classical PDAC lines presented higher levels of free fatty acid (FFA)  
218 compared to the 4 QM lines (figure 2c). Among PDCs, the highest FFA levels were measured  
219 in classical PDC89 (figure 2c). In other investigated PDCs, FFA content did not correlate with  
220 the molecular subtype. PDC80, though QM, presented relatively high FFA levels and  
221 comparable to a classical PDC59. Taken together, QM PDAC cell lines preferably stored their  
222 FA in form of lipid droplets, while in classical cells FA was freely available for cellular processes  
223 such as FA-mitochondrial beta oxidation or incorporation into structural lipids. In PDCs, a  
224 similar trend but higher diversity in distribution of FA and storage lipids was observed.  
225 Both structural and energy storing lipids are synthesized and matured in the endoplasmatic  
226 reticulum and the Golgi complex [Fagone and Jackowski, 2009; Pol et al., 2014]. Considering  
227 the observed differences in lipid management in QM and classical subsets, we analyzed Golgi  
228 complex morphology by anti-giantin immunofluorescence staining and observed a remarkable  
229 subtype-dependent Golgi morphology. In QM cell lines and PDCs, we observed a highly  
230 compact and well-organized Golgi complex with perinuclear localization. In contrast, classical  
231 cell lines and PDCs showed a dispersed Golgi complex (figure 2d). In some PDCs, we also  
232 observed heterogeneity within one cell population. In PDC69, though classified as QM and  
233 with a predominantly compact Golgi, some cells presented disperse Golgi structures as well.  
234 The same was true for classical PDC58 cells that presented compact and dispersed Golgi as  
235 well. In summary, Golgi complex showed a subtype-associated morphological organization  
236 potentially reflecting different needs of classical and QM cells for structural and energy lipids  
237 observed above.

238 Distribution of FA and energy storing lipids suggested that QM PDAC cells do not use but  
239 rather deposit the FA in lipid droplets, while classical cells have FA freely available for eventual  
240 use in mitochondrial beta-oxidation as well. We thus investigated lipid metabolism in QM and  
241 classical cells by using the seahorse metabolic flux assays (figure 2e). These real-time assays  
242 are performed in living cells and evaluate Extracellular Acidification Rate (ECAR) and Oxygen  
243 Consumption Rate (OCR) as readouts of two major energy supplying processes, glycolysis  
244 and oxidative phosphorylation (OxPhos) respectively. We designed a short-term energy  
245 evaluating seahorse experiment by cultivating the PDAC cell lines and PDCs for 7 hours in  
246 media without glucose or glutamine where only intracellular intrinsically available resources,  
247 such as FA, are present. Basal cellular OCR was then measured. In such conditions, higher  
248 OCRs were observed in HPAF II, HPAC, HUPT4 and PDC89 classical cells (figure 2e) among  
249 cell lines and PDCs respectively, potentially attributable to oxidation of intrinsically available  
250 FA. Taken together, metabolic flux assays suggest that some classical cells actively oxidize  
251 FA to maintain their basal metabolism.



252 To validate these findings in a more complex and translational *ex vivo* setting, we analyzed  
253 the metabolite distribution in fresh-frozen PDX tumor samples as well. For this purpose, non-  
254 targeted metabolic profiling of cryo-preserved PDX tissues using MALDI-MSI (matrix-assisted  
255 laser desorption/ionization- mass spectrometry imaging) was used. As in cells, accumulation  
256 of structural lipids in the classical PDX was detected. In 10 PDX (5 QM vs 5 classical),  
257 metabolite clustering into classical and QM groups was observed despite the limited number  
258 of samples (figure 2f). Considering significantly altered metabolites between classical and QM  
259 revealed by a U-test, we performed metabolic pathway analysis (supplementary figure 2a).  
260 Glycerophospholipid metabolism was among the top 5 most changed pathways with  
261 glycerylphosphorylethanolamine (m/z=214.049) and phosphatidylcholine (m/z=794.509) being  
262 significantly higher in the classical samples (figure 2f). Interestingly, D-4'-  
263 phosphopantothenate (m/z=280.0595), a coenzyme A (CoA) precursor, was expressed  
264 exclusively in classical PDX tumors (figure 2g). Additionally, we also performed MALDI-MSI in  
265 a cohort of human FFPE PDAC samples (tissue microarray, n=17). Samples were stratified to  
266 QM and classical based on histological expression of KRT81 and HNF1A expression as  
267 previously reported [Muckenhuber et al., 2018]. As in PDX tumors, higher levels of D-4'-  
268 phosphopantothenate were detected in the classical human PDAC FFPE samples (figure 2g).  
269 CoA is central for many enzymatic reactions in lipid synthesis and FA oxidation [Rohrig and  
270 Schulze, 2016], probably underlying the enrichment of D-4'-phosphopantothenate in the  
271 classical samples.  
272 Taken together, prominent accumulation of structural lipids was detected in classical patient  
273 derived xenografts indicating preservation of lipid metabolic routes in a relevant patient-derived  
274 PDAC model system.

275

### 276 ***Glycolysis is activated in selected PDAC cells***

277 Gene set enrichment analysis pinpointed glycolysis as the most prominent metabolic pathway  
278 present in QM samples. To confirm whether glycolysis is indeed active in QM PDAC cells, we  
279 performed the seahorse metabolic flux assay and evaluated glycolysis (ECAR) and OxPhos  
280 (OCR) in cell lines and PDCs cultivated in media containing physiological concentrations of  
281 glucose (5mM) and glutamine (2mM). Under these conditions, PSN1 and PDC69, both QM,  
282 presented the highest ECAR/OCR ratios among cell lines and PDCs respectively (figure 3a),  
283 indicating higher glycolytic activity in these cells (figure 3a).

284 Hierarchical clustering of transcriptome data revealed generally higher expression of glycolytic  
285 genes in QM cell lines and PDCs, especially in PSN1 and PDC69 and PDC80 (figure 3b).  
286 Notably, genes coding the glycolytic enzyme lactate dehydrogenase A (*LDHA*), lactate  
287 exporter MCT4 (*SLC16A3*) and importer MCT1(*SLC16A1*) and HIF1a, a central transcriptional  
288 and cellular regulator of hypoxia and glycolysis, were also well expressed in PSN1, PDC69

289 and PDC80 cells (figure 3c). MCT4 has previously been suggested to be a marker of glycolytic  
290 PDACs [Baek et al., 2014]. We also observed both in PDX and bulk PDAC tissue samples that  
291 MCT4 (*SLC16A3*) was significantly higher expressed than MCT1 (*SLC16A1*) (supplementary  
292 figure 3a), further supporting a lead role of MCT4 as lactate transporter in tissue context.  
293 Furthermore, in PDAC patient samples, MCT4 gene expression was significantly higher in QM  
294 than in classical PDACs (figure 3d)

295 An immunohistochemical analysis of MCT1, MCT4 and an established QM marker KRT81  
296 [Noll et al., 2016] in FFPE samples of 30 PDACs suggested that both MCT4 and MCT1 were  
297 expressed on cancer and stromal cells with however MCT4 more expressed on cancer cells,  
298 and MCT1 in the surrounding stroma (supplementary figure 3b). Multiplex  
299 immunofluorescence for PanCytokeratin (PanCK), KRT81 and MCT4 in 6 PDAC specimens  
300 showed that the proportion of MCT4 positive cells was much higher among KRT81 positive  
301 (30-50%) than KRT81 negative cells (< 20%) (figure 3e). Furthermore, high MCT4 gene  
302 expression also correlated with poor survival, supporting the correlation of MCT4 expression  
303 and QM subtype (supplementary figure 3c).

304 Taken together, active glycolysis was observed in some of QM PDAC cells and correlated well  
305 with the high MCT4 expression. Our data support the use of MCT4 as a surrogate marker of  
306 QM PDACs with activated glycolysis.

307

### 308 ***PDAC cells actively use lactate as oxidative fuel***

309 Active re-usage of lactate by its conversion to pyruvate and subsequent oxidation in the  
310 mitochondria has been suggested in PDAC [Hui et al., 2017]. However, whether this effect is  
311 especially attributable to lactate producing high glycolytic QM PDAC cells is still not known.  
312 Intrigued by high glycolysis and consequent high expression of lactate transporters detected  
313 in some of the PDAC cells, we also addressed lactate metabolism. To investigate this, we  
314 designed a Seahorse metabolic flux assay experiment, where cells were cultivated for 7 hours  
315 in i) “basal” DMEM or RPMI media without glucose or glutamine supplementation or in ii)  
316 “basal” media supplemented with lactate (basal+10mM L-lactate). Consequently, metabolic  
317 flux measurement was performed and OCR values measured in media with and without lactate  
318 were compared. Interestingly, lactate was readily used as an oxidative fuel in cell lines of both  
319 subtypes with however more pronounced OCR increase in the QM PDAC cell lines (figure 3f).  
320 Lactate treatment led to an OCR increase in all PDCs as well, without pronounced subtype  
321 dependency (figure 3f).

322 To substantiate this finding, we cultivated PSN1 (QM), PaTu8988T (QM) and PaTu8988S  
323 (classical) cells in physiological DMEM medium with 5mM glucose and 2mM glutamine without  
324 media change for 24-48-72-96 hours. Glucose and lactate concentrations in the media were  
325 measured at given time points. With time, glucose concentration in the media decreased and

326 lactate increased (0-72 hours), as expected due to glucose consumption and lactate  
327 production and accumulation. Once the glucose was consumed from the medium (approx.  
328 after 72 hours in PaTu8988T/PSN1 cells), lactate concentration in the media decreased,  
329 indicating that in absence of other resources, PDAC cells start consuming self-produced  
330 lactate (supplementary figure 3d).

331 In conclusion, PDAC cells, regardless of subtype, not only actively produce and excrete  
332 glycolytically produced lactate but also actively re-use it potentially as an oxidative fuel. This  
333 phenomenon was more pronounced in QM than in classical PDAC cell lines.

### 334 335 ***Metabolic inhibitors do not show subtype specific effects in primary PDAC cells***

336 Stratification to glycolytic and oxidative PDACs is a prerequisite for patient-tailored metabolic  
337 treatment strategies. Thus, we sought to therapeutically address the observed metabolic  
338 differences and treated PDAC cells using an anti-glycolytic and two anti-oxidative metabolic  
339 drugs: the glycolytic inhibitor GNE-140 [Boudreau et al., 2016], the mitochondrial respiratory  
340 chain inhibitor phenformin [Boudreau et al., 2016] and TriacsinC, inhibitor of FA acylation  
341 and activation for lipid synthesis, deposition and beta-oxidation [Tang et al., 2018] (figure 4a).  
342 We followed the concentration dependent inhibition of metabolic active cells via cell titer glo  
343 assay. GNE-140 treatment indeed induced a QM subtype-specific decrease in cell viability  
344 especially in the QM cell lines, being most effective in PSN1, MIAPaca2 and PaTu8988T cells.  
345 However, PDCs were in general less sensitive to GNE-140 and the observed inhibitory effects  
346 were not subtype-dependent. Phenformin treatment induced a decrease in viability equally  
347 efficient in both QM and classical PDAC cell lines, while PDCs were rather unaffected. Triacsin  
348 C was active in all cell lines with a trend towards stronger viability inhibition in QM cells,  
349 probably by targeting accumulation of fatty acid in lipid droplets observed in these cells. The  
350 compound was also active in primary cells, however without an obvious subtype-specific effect  
351 (figure 4a). Taken together, though the LDHA inhibitor GNE-140 presented stronger efficacy  
352 against QM PDAC cell lines as expected, in the PDCs we did not observe subtype specific  
353 inhibition of cell viability with neither glycolytic nor inhibitors of oxidative metabolism.

### 354 355 ***Hyperpolarized magnetic resonance spectroscopy of [1-<sup>13</sup>C]pyruvate and [1-<sup>13</sup>C] lactate*** 356 ***identifies QM tumors***

357 Pharmacological inhibition suggested efficacy of GNE-140 in glycolytic cells arguing for the  
358 need of unequivocal identification of highly glycolytic PDACs for successful metabolic  
359 targeting. However, detection of dominant metabolic pathways driving tumor phenotypes  
360 remains a highly challenging task and is currently not established in clinical routine. Thus, we  
361 sought to explore hyperpolarized magnetic resonance spectroscopy with hyperpolarized (HP)  
362 [1-<sup>13</sup>C]pyruvate and [1-<sup>13</sup>C]lactate for potential differentiation of highly glycolytic from oxidative

363 tumors *in vivo*. For this purpose, rats were subcutaneously implanted with glycolytic QM PSN1  
364 and classical HPAC cells. Consistent with the respective molecular subtype, PSN1 tumors  
365 presented an undifferentiated mesenchymal phenotype, while HPAC tumors showed a more  
366 differentiated epithelial morphology (supplementary figure 4a). Once the tumors reached a  
367 minimal size of 5 x 5 mm, metabolic spectroscopy was performed. HP-[1-<sup>13</sup>C]pyruvate was i.v.  
368 injected into the tail vein and intratumoral distribution of HP-[1-<sup>13</sup>C]lactate was followed in real-  
369 time. Using MRS, significantly more HP-[1-<sup>13</sup>C]lactate was detected in PSN1 compared to  
370 HPAC tumors, supporting higher label exchange between pyruvate and lactate specifically in  
371 PSN1 tumors (figure 5a and 5b). Lactate dehydrogenase (LDH) enzymatic activity measured  
372 *ex vivo* after the spectroscopy experiment in snap frozen tissues was also higher in PSN1  
373 compared to HPAC tumors (figure 5c) consistent with the *in vivo* finding.

374 To evaluate whether lactate can also be used by tumors *in vivo* as observed *in vitro* in seahorse  
375 experiments, we also performed the reverse experiment and injected HP-[1-<sup>13</sup>C]lactate in  
376 PSN1 and HPAC tumor rats *in vivo*. Intratumoral HP-[1-<sup>13</sup>C]pyruvate was detected in PSN1  
377 tumors only (figure 5d) and not in HPAC tumors. Accordingly, significantly higher PApyr/PAlac  
378 ratios were measured for PSN1 than HPAC tumors (figure 5e). Taken together, highly  
379 glycolytic PSN1 xenografts could readily be discriminated based on high HP-[1-<sup>13</sup>C]pyruvate  
380 to HP-[1-<sup>13</sup>C]lactate conversion rates observed in HP-MRS. The data also showed that in  
381 glycolytic PDACs, exogenous lactate can be metabolized to pyruvate.

382 We further confirmed the highly glycolytic nature of PSN1 xenografts by immunohistochemical  
383 analysis of glycolytic markers HIF1A and MCT4. MCT4 showed the typical membrane-  
384 associated expression in cancer cells in both xenografts, with somewhat stronger staining  
385 intensity in PSN1 tumors (figure 5f). Intriguingly, HIF1A staining was found exclusively in the  
386 PSN1 tumors with typical nuclear expression pattern in the cancer cells (figure 5f). We also  
387 analyzed HIF1A and MCT4 expression in murine xenografts of human PDAC cell lines  
388 (supplementary figure 4b). Indeed, stronger MCT4 staining intensity was observed in the QM  
389 xenografts in general. Furthermore, specific nuclear HIF1A expression was limited to QM  
390 tumors (PSN1, KP4, MIAPaCa2, PaTu8988T), and not detected in classical tumors (HPAFII,  
391 PaTu8988S, HUPT4, HPAC) (supplementary figure 4b).

392  
393  
394

## 395 **Discussion**

396 The challenge in PDAC is its enormous therapy resistance due to the evolution of aggressive  
397 cancer cells driven by oncogenic KRAS and loss of key tumor suppressors in a complex  
398 adapting microenvironment with various signaling effectors and biophysical and hypoxic  
399 restraints. Despite considerable genetic homogeneity with regard to oncogenic KRAS as lead  
400 driver, many studies support the existence of several molecular PDAC subtypes including  
401 classical/progenitor, QM/squamous/basal-like and hybrid states with more or less pronounced  
402 subtype specific transcriptional programs [Chan-Seng-Yue et al., 2020; Collisson et al., 2011;  
403 Moffitt et al., 2015]. Though indisputably present, functional aspects and phenotypic cues of  
404 the defined transcriptional subtypes are less well known. One key feature of PDAC is the  
405 metabolic rewiring directed by cell-autonomous and microenvironmental signals that may lead  
406 to phenotypic features not entirely captured by transcriptomic signatures. In this work, we  
407 aimed to address the functional metabolic aspects guided by transcriptome-defined classical  
408 and QM/basal like subtyping. We focused this analysis on patient-derived model systems  
409 including PDX and PDCs to value the molecular and metabolic heterogeneity in primary PDAC  
410 model systems.

411 Gene expression analysis in four different model systems (cell lines, PDC, PDX and bulk tissue  
412 samples) indeed identified glucose metabolism/glycolysis/hypoxia and cholesterol/lipid/fatty  
413 acid metabolism as dominating metabolic transcripts of the QM and classical subtype,  
414 respectively. This is in line with the previously observed “glycolytic” and “lipogenic” subtypes  
415 in PDAC cell lines [Daemen et al., 2015] and the recently reported “glycolytic” and  
416 “cholesterogenic” transcriptional PDAC subtypes [Karasinska et al., 2020]. In functional  
417 assays, we also observed that these transcriptional cues were correlating with metabolic  
418 behavior with however notable heterogeneity especially in patient-derived cells. Neither the  
419 lipid nor glycolytic effect was equally exposed in all of the cells of one subtype.

420 We identified PSN1, PDC69 and PDC80 as being typically glycolytic in seahorse assays and  
421 with high gene expression of the glycolytic markers HIF1A, LDHA and MCT4, supporting the  
422 translation of transcripts in active glucose metabolism. Interestingly, HIF1A, a major  
423 transcriptional regulator of cellular response to hypoxia [Semenza, 2010], was well expressed  
424 in highly glycolytic cells here grown in typical *in vitro* normoxic conditions, supporting intrinsic  
425 gene expression programs well preserved in QM cells. In line with our observations, MCT4  
426 has already been suggested as marker of glycolytic PDACs with poor prognosis [Baek et al.,  
427 2014]. It should however be noted that Seahorse assays evaluate ECAR and OCR values in  
428 *in vitro* conditions and are very dependent on cell culture features such as current cellular  
429 density, growth pattern, cell cycle, current mitochondrial number [Little et al., 2020] and should  
430 be interpreted only as indication of the cellular energetic status. Better functional metabolic  
431 assays for *in vitro* and *in vivo* application are indeed needed.

432 Classical PDAC cells were rich in intracellular free FA, which were actively used in  
433 mitochondrial oxidation, allowing the cell to maintain the basal metabolism even in complete  
434 absence of glucose and glutamine. Our observations of different lipid/fatty acid usage of the  
435 subtypes may open a new road of further non-invasive imaging-based stratification of PDAC  
436 e.g. by using  $^1\text{H}$ -based diffusion-weighted magnetic resonance spectroscopy [Weidlich et al.,  
437 2019] or other quantitative MRS methods [Nemeth et al., 2018].

438 Heterogeneity was also present in reaction to metabolic therapies. Especially in the primary  
439 lines, neither the glycolysis inhibitor GNE-140 nor the OxPhos inhibitor Phenformin or lipid  
440 metabolism inhibitor TriacsinC showed subtype specific effects. These results suggests that  
441 rigid classification of PDAC subtypes may not be sufficient as the basis for decisions regarding  
442 metabolic targeting approaches. Rather, individual PDACs may often present a continuum of  
443 different metabolic states that are more or less phenotypically presented depending on various  
444 cell-autonomous and non-cell-autonomous cues. Hybrid PDAC subtypes with transcriptomic  
445 signatures in between the classical and QM/basal-like states have been highlighted recently  
446 [Chan-Seng-Yue et al., 2020; Karasinska et al., 2020]. Similar to our study, a correlation of  
447 functional (seahorse) and molecular (RNA and protein) OxPhos was recently reported for  
448 PDAC cells [Masoud et al., 2020]. The authors also reported on metabolic heterogeneity and  
449 flexibility and shifts from OxPhos or glycolysis when necessary, supporting the existence of  
450 plastic metabolic states depending on the environmental challenges. It is reasonable to  
451 assume that among PDAC cells a whole spectrum from weak to highly mesenchymal and  
452 glycolytic QM, and weak to highly epithelial and lipogenic PDAC cells exists. The exclusive  
453 dependency on the one or the other metabolic pathway is thus an unlikely scenario. However,  
454 individual tumors with high activity of specific metabolic pathway may exist and their  
455 identification will be key to successful targeting. We show here that glycolytic PSN1 tumors  
456 were readily detectable with HP-MRS due to higher  $^{13}\text{C}$ -label exchange among pyruvate and  
457 lactate, indicating high activity of the last glycolytic enzyme LDHA and high intratumoral  
458 pyruvate to lactate conversion. Similarly, in breast cancer patients, high HP-[1- $^{13}\text{C}$ ]pyruvate to  
459 HP-[1- $^{13}\text{C}$ ]lactate conversion rates identified strongly glycolytic aggressive triple negative  
460 breast cancer with high HIF1a and MCT1 tissue expression [Gallagher et al., 2020]. This  
461 approach is already being used in personalized therapy monitoring in prostate and breast  
462 cancer [Aggarwal et al., 2017; Park et al., 2018].

463 We were also able to in vivo confirm the reverse effect as well, the active import and conversion  
464 of HP-[1- $^{13}\text{C}$ ]lactate into HP-[1- $^{13}\text{C}$ ]pyruvate in PSN1 QM-type but not in HPAC classical-type  
465 xenografts. Lactate is since recently considered as one of the important actors in tumor  
466 metabolism [Brooks, 2018]. Tumors use the advantage of lactate being the second most  
467 abundant metabolite in the systemic circulation and readily feed the TCA cycle with pyruvate  
468 generated from lactate [Faubert et al., 2017; Hui et al., 2017]. Indeed, we also observed

469 OxPhos activation with lactate in PDAC cells, especially in the QM cell lines. It should be  
470 however noted that we performed the lactate supplementation assay in starved medium in  
471 absence of glutamine and glucose, an important TCA cycle fuel [Son et al., 2013]. Under these  
472 conditions, cells might divert to more drastic fueling of TCA cycle with lactate than  
473 physiologically typical. We speculate that the hypoxic microenvironment of the tumor favors  
474 the epithelial to mesenchymal transformation (EMT) of the cancer cells and appearance of the  
475 glycolytic QM tumors. These tumors potentially adapted their oxidative metabolism to fuels  
476 which are then locally produced, either by themselves or by neighboring cancer, stromal or  
477 immune cells.

478 Although HP-MRS experiments were performed on a limited number of animals, they provide  
479 evidence for the concept that PDACs with high reliance on glycolysis are potentially detectable  
480 via HP-[1-<sup>13</sup>C]pyruvate/lactate spectroscopy also in clinical practice. Thus, identification of  
481 highly glycolytic, aggressive PDACs by HP-[1-<sup>13</sup>C]pyruvate and HP-[1-<sup>13</sup>C]lactate  
482 spectroscopy may be used to guide and monitor tumor treatment with anti-glycolytic therapies.  
483 In contrast to biopsy-based tumor characterization, metabolic imaging allows dynamic  
484 evaluation of the whole tumor limiting sampling bias and addressing tumor heterogeneity  
485 [Hayashi et al., 2020]. Though likely not all QM tumors are potentially extremely glycolytic,  
486 non-invasive detection of highly glycolytic PDACs detected by HP-[1-<sup>13</sup>C]pyruvate/lactate MRS  
487 may be first candidates for successful individual metabolic targeting approaches.

488

489

490 **Material and methods**

491 **Cell culture**

492 **PDAC cell lines**

493 All PDAC cell lines have been obtained from the ATCC and regularly externally authenticated  
494 (at least once a year). PDAC cell lines (Psn1, Kp4, PaTu8988T, MiaPaca2, PaTu8988S,  
495 HPAC, HPAFII, HupT4) were grown in Dulbecco's Modified Eagle Medium (DMEM,  
496 #11966025 and #A1443001, Thermo Fisher Scientific, Waltham, USA) adapted to final  
497 concentrations of 5 mM D-glucose (Thermo Fisher Scientific, Waltham, USA), 2 mM  
498 L-glutamine, 5% v/v fetal bovine serum (FBS, Thermo Fisher Scientific, Waltham, USA), and  
499 1% v/v penicillin/streptomycin (P/S, Thermo Fisher Scientific, Waltham, USA) if not stated  
500 otherwise.

501 **Patient Derived Cells (PDCs)**

502 For all metabolic analysis, PDC cell lines were cultivated in a 1:1 mixture of Keratinocyte-SF  
503 medium (#17005075, Thermo Fisher Scientific, Waltham, USA) and RPMI 1640 (#11879020,  
504 Thermo Fisher Scientific, Waltham, USA) adapted to final concentrations of 5mM D-glucose,  
505 4.5mM L-glutamine, 0.26mM sodium pyruvate, and 6%v/vFBS, and 1% v/v  
506 penicillin/streptomycin (P/S, Thermo Fisher Scientific, Waltham, USA) if not stated otherwise.

507

508 **PDX samples preparation**

509 Establishment of the PDX mouse model was performed using surgically resected PDAC  
510 tissues collected from patients.

511

512 **Seahorse metabolic flux assays**

513 All assays were performed following the manufacturer's instructions (Agilent Technologies).

514

515 **Immunohistochemistry (IHC) and immunofluorescence**

516 Immunohistochemistry was performed according to standard laboratory procedures on PFA  
517 fixed, FFPE tissue samples. Antibodies used in this study: MCT4, Atlas Antibodies  
518 (HPA021451); HIF1a, BD Transduction laboratories (610959); MCT1, Abcam, ab85021;  
519 KRT81, Santa Cruz, sc-100929; panCytokeratin, Abcam (ab6401);

520

521 **Hyperpolarized Magnetic Resonance Spectroscopy (HP-MRS)**

522 **Animal handling**

523 All experiments were carried out in adherence to pertinent laws and regulations.

524



525 Detailed explanations of all experimental procedures can be found in supplementary material  
526 and methods section.  
527  
528

529 **Bibliography:**

- 530
- 531 Aggarwal R, Vigneron DB, Kurhanewicz J: Hyperpolarized 1-[(13)C]-Pyruvate Magnetic  
532 Resonance Imaging Detects an Early Metabolic Response to Androgen Ablation  
533 Therapy in Prostate Cancer. *Eur Urol* 2017;72:1028-1029.
- 534 Aung KL, Fischer SE, Denroche RE, Jang GH, Dodd A, Creighton S, Southwood B, Liang SB,  
535 Chadwick D, Zhang A, O'Kane GM, Albaba H, Moura S, Grant RC, Miller JK, Mbabaali  
536 F, Pasternack D, Lungu IM, Bartlett JMS, Ghai S, Lemire M, Holter S, Connor AA,  
537 Moffitt RA, Yeh JJ, Timms L, Krzyzanowski PM, Dhani N, Hedley D, Notta F, Wilson  
538 JM, Moore MJ, Gallinger S, Knox JJ: Genomics-Driven Precision Medicine for  
539 Advanced Pancreatic Cancer: Early Results from the COMPASS Trial. *Clin Cancer*  
540 *Res* 2018;24:1344-1354.
- 541 Badea L, Herlea V, Dima SO, Dumitrascu T, Popescu I: Combined gene expression analysis  
542 of whole-tissue and microdissected pancreatic ductal adenocarcinoma identifies genes  
543 specifically overexpressed in tumor epithelia. *Hepatogastroenterology* 2008;55:2016-  
544 2027.
- 545 Baek G, Tse YF, Hu Z, Cox D, Buboltz N, McCue P, Yeo CJ, White MA, DeBerardinis RJ,  
546 Knudsen ES, Witkiewicz AK: MCT4 defines a glycolytic subtype of pancreatic cancer  
547 with poor prognosis and unique metabolic dependencies. *Cell Rep* 2014;9:2233-2249.
- 548 Bailey P, Chang DK, Nones K, Johns AL, Patch AM, Gingras MC, Miller DK, Christ AN, Bruxner  
549 TJ, Quinn MC, Nourse C, Murtaugh LC, Harliwong I, Idrisoglu S, Manning S,  
550 Nourbakhsh E, Wani S, Fink L, Holmes O, Chin V, Anderson MJ, Kazakoff S, Leonard  
551 C, Newell F, Waddell N, Wood S, Xu Q, Wilson PJ, Cloonan N, Kassahn KS, Taylor D,  
552 Quek K, Robertson A, Pantano L, Mincarelli L, Sanchez LN, Evers L, Wu J, Pinese M,  
553 Cowley MJ, Jones MD, Colvin EK, Nagrial AM, Humphrey ES, Chantrill LA, Mawson  
554 A, Humphris J, Chou A, Pajic M, Scarlett CJ, Pinho AV, Giry-Laterriere M, Rooman I,  
555 Samra JS, Kench JG, Lovell JA, Merrett ND, Toon CW, Epari K, Nguyen NQ, Barbour  
556 A, Zeps N, Moran-Jones K, Jamieson NB, Graham JS, Duthie F, Oien K, Hair J,  
557 Grutzmann R, Maitra A, Iacobuzio-Donahue CA, Wolfgang CL, Morgan RA, Lawlor RT,  
558 Corbo V, Bassi C, Rusev B, Capelli P, Salvia R, Tortora G, Mukhopadhyay D, Petersen  
559 GM, Australian Pancreatic Cancer Genome I, Munzy DM, Fisher WE, Karim SA,  
560 Eshleman JR, Hruban RH, Pilarsky C, Morton JP, Sansom OJ, Scarpa A, Musgrove  
561 EA, Bailey UM, Hofmann O, Sutherland RL, Wheeler DA, Gill AJ, Gibbs RA, Pearson  
562 JV, Waddell N, Biankin AV, Grimmond SM: Genomic analyses identify molecular  
563 subtypes of pancreatic cancer. *Nature* 2016;531:47-52.
- 564 Biancur DE, Kimmelman AC: The plasticity of pancreatic cancer metabolism in tumor  
565 progression and therapeutic resistance. *Biochim Biophys Acta Rev Cancer*  
566 2018;1870:67-75.
- 567 Boudreau A, Purkey HE, Hitz A, Robarge K, Peterson D, Labadie S, Kwong M, Hong R, Gao  
568 M, Del Nagro C, Pusapati R, Ma S, Salphati L, Pang J, Zhou A, Lai T, Li Y, Chen Z,  
569 Wei B, Yen I, Sideris S, McClelland M, Firestein R, Corson L, Vanderbilt A, Williams S,  
570 Daemen A, Belvin M, Eigenbrot C, Jackson PK, Malek S, Hatzivassiliou G, Sampath  
571 D, Evangelista M, O'Brien T: Metabolic plasticity underpins innate and acquired  
572 resistance to LDHA inhibition. *Nat Chem Biol* 2016;12:779-786.
- 573 Brooks GA: The Science and Translation of Lactate Shuttle Theory. *Cell Metab* 2018;27:757-  
574 785.
- 575 Cancer Genome Atlas Research Network. Electronic address aadhe, Cancer Genome Atlas  
576 Research N: Integrated Genomic Characterization of Pancreatic Ductal  
577 Adenocarcinoma. *Cancer Cell* 2017;32:185-203 e113.
- 578 Chan-Seng-Yue M, Kim JC, Wilson GW, Ng K, Figueroa EF, O'Kane GM, Connor AA,  
579 Denroche RE, Grant RC, McLeod J, Wilson JM, Jang GH, Zhang A, Dodd A, Liang SB,  
580 Borgida A, Chadwick D, Kalimuthu S, Lungu I, Bartlett JMS, Krzyzanowski PM, Sandhu  
581 V, Tiriack H, Froeling FEM, Karasinska JM, Topham JT, Renouf DJ, Schaeffer DF,  
582 Jones SJM, Marra MA, Laskin J, Chetty R, Stein LD, Zogopoulos G, Haibe-Kains B,  
583 Campbell PJ, Tuveson DA, Knox JJ, Fischer SE, Gallinger S, Notta F: Transcription

- 584 phenotypes of pancreatic cancer are driven by genomic events during tumor evolution.  
585 Nat Genet 2020;52:231-240.
- 586 Collisson EA, Sadanandam A, Olson P, Gibb WJ, Truitt M, Gu S, Cooc J, Weinkle J, Kim GE,  
587 Jakkula L, Feiler HS, Ko AH, Olshen AB, Danenberg KL, Tempero MA, Spellman PT,  
588 Hanahan D, Gray JW: Subtypes of pancreatic ductal adenocarcinoma and their  
589 differing responses to therapy. Nat Med 2011;17:500-503.
- 590 Daemen A, Peterson D, Sahu N, McCord R, Du X, Liu B, Kowanetz K, Hong R, Moffat J, Gao  
591 M, Boudreau A, Mroue R, Corson L, O'Brien T, Qing J, Sampath D, Merchant M, Yauch  
592 R, Manning G, Settleman J, Hatzivassiliou G, Evangelista M: Metabolite profiling  
593 stratifies pancreatic ductal adenocarcinomas into subtypes with distinct sensitivities to  
594 metabolic inhibitors. Proc Natl Acad Sci U S A 2015;112:E4410-4417.
- 595 DeBerardinis RJ, Chandel NS: Fundamentals of cancer metabolism. Sci Adv  
596 2016;2:e1600200.
- 597 Fagone P, Jackowski S: Membrane phospholipid synthesis and endoplasmic reticulum  
598 function. J Lipid Res 2009;50 Suppl:S311-316.
- 599 Faubert B, Li KY, Cai L, Hensley CT, Kim J, Zacharias LG, Yang C, Do QN, Doucette S,  
600 Burguete D, Li H, Huet G, Yuan Q, Wigal T, Butt Y, Ni M, Torrealba J, Oliver D,  
601 Lenkinski RE, Malloy CR, Wachsmann JW, Young JD, Kernstine K, DeBerardinis RJ:  
602 Lactate Metabolism in Human Lung Tumors. Cell 2017;171:358-371 e359.
- 603 Gallagher FA, Woitek R, McLean MA, Gill AB, Manzano Garcia R, Provenzano E, Riemer F,  
604 Kaggie J, Chhabra A, Ursprung S, Grist JT, Daniels CJ, Zaccagna F, Laurent MC,  
605 Locke M, Hilborne S, Fray A, Torheim T, Bournsnel C, Schiller A, Patterson I, Slough  
606 R, Carmo B, Kane J, Biggs H, Harrison E, Deen SS, Patterson A, Lanz T, Kingsbury  
607 Z, Ross M, Basu B, Baird R, Lomas DJ, Sala E, Wason J, Rueda OM, Chin SF,  
608 Wilkinson IB, Graves MJ, Abraham JE, Gilbert FJ, Caldas C, Brindle KM: Imaging  
609 breast cancer using hyperpolarized carbon-13 MRI. Proc Natl Acad Sci U S A  
610 2020;117:2092-2098.
- 611 Hayashi A, Yavas A, McIntyre CA, Ho YJ, Erakky A, Wong W, Varghese AM, Melchor JP,  
612 Overholtzer M, O'Reilly EM, Klimstra DS, Basturk O, Iacobuzio-Donahue CA: Genetic  
613 and clinical correlates of entosis in pancreatic ductal adenocarcinoma. Mod Pathol  
614 2020;33:1822-1831.
- 615 Hui S, Ghergurovich JM, Morscher RJ, Jang C, Teng X, Lu W, Esparza LA, Reya T, Le Z,  
616 Yanxiang Guo J, White E, Rabinowitz JD: Glucose feeds the TCA cycle via circulating  
617 lactate. Nature 2017;551:115-118.
- 618 Karasinska JM, Topham JT, Kalloger SE, Jang GH, Denroche RE, Culibrk L, Williamson LM,  
619 Wong HL, Lee MKC, O'Kane GM, Moore RA, Mungall AJ, Moore MJ, Warren C,  
620 Metcalfe A, Notta F, Knox JJ, Gallinger S, Laskin J, Marra MA, Jones SJM, Renouf DJ,  
621 Schaeffer DF: Altered Gene Expression along the Glycolysis-Cholesterol Synthesis  
622 Axis Is Associated with Outcome in Pancreatic Cancer. Clin Cancer Res 2020;26:135-  
623 146.
- 624 Little AC, Kovalenko I, Goo LE, Hong HS, Kerk SA, Yates JA, Purohit V, Lombard DB, Merajver  
625 SD, Lyssiotis CA: High-content fluorescence imaging with the metabolic flux assay  
626 reveals insights into mitochondrial properties and functions. Commun Biol 2020;3:271.
- 627 Masoud R, Reyes-Castellanos G, Lac S, Garcia J, Dou S, Shintu L, Abdel Hadi N, Gicquel T,  
628 El Kaoutari A, Dieme B, Tranchida F, Cormareche L, Borge L, Gayet O, Pasquier E,  
629 Duseti N, Iovanna J, Carrier A: Targeting Mitochondrial Complex I Overcomes  
630 Chemoresistance in High OXPHOS Pancreatic Cancer. Cell Rep Med 2020;1:100143.
- 631 Maupin KA, Sinha A, Eugster E, Miller J, Ross J, Paulino V, Keshamouni VG, Tran N, Berens  
632 M, Webb C, Haab BB: Glycogene expression alterations associated with pancreatic  
633 cancer epithelial-mesenchymal transition in complementary model systems. PLoS One  
634 2010;5:e13002.
- 635 Moffitt RA, Marayati R, Flate EL, Volmar KE, Loeza SG, Hoadley KA, Rashid NU, Williams LA,  
636 Eaton SC, Chung AH, Smyla JK, Anderson JM, Kim HJ, Bentrem DJ, Talamonti MS,  
637 Iacobuzio-Donahue CA, Hollingsworth MA, Yeh JJ: Virtual microdissection identifies  
638 distinct tumor- and stroma-specific subtypes of pancreatic ductal adenocarcinoma. Nat  
639 Genet 2015;47:1168-1178.

- 640 Muckenhuber A, Berger AK, Schlitter AM, Steiger K, Konukiewitz B, Trumpp A, Eils R, Werner  
641 J, Friess H, Esposito I, Kloppel G, Ceyhan GO, Jesinghaus M, Denkert C, Bahra M,  
642 Stenzinger A, Sprick MR, Jager D, Springfield C, Weichert W: Pancreatic Ductal  
643 Adenocarcinoma Subtyping Using the Biomarkers Hepatocyte Nuclear Factor-1A and  
644 Cytokeratin-81 Correlates with Outcome and Treatment Response. *Clin Cancer Res*  
645 2018;24:351-359.
- 646 Nemeth A, Segrestin B, Leporq B, Coum A, Gambarota G, Seyssel K, Laville M, Beuf O,  
647 Ratiney H: Comparison of MRI-derived vs. traditional estimations of fatty acid  
648 composition from MR spectroscopy signals. *NMR Biomed* 2018;31:e3991.
- 649 Noll EM, Eisen C, Stenzinger A, Espinet E, Muckenhuber A, Klein C, Vogel V, Klaus B, Nadler  
650 W, Rosli C, Lutz C, Kulke M, Engelhardt J, Zickgraf FM, Espinosa O, Schlesner M,  
651 Jiang X, Kopp-Schneider A, Neuhaus P, Bahra M, Sinn BV, Eils R, Giese NA, Hackert  
652 T, Strobel O, Werner J, Buchler MW, Weichert W, Trumpp A, Sprick MR: CYP3A5  
653 mediates basal and acquired therapy resistance in different subtypes of pancreatic  
654 ductal adenocarcinoma. *Nat Med* 2016;22:278-287.
- 655 Park I, Larson PEZ, Gordon JW, Carvajal L, Chen HY, Bok R, Van Criekinge M, Ferrone M,  
656 Slater JB, Xu D, Kurhanewicz J, Vigneron DB, Chang S, Nelson SJ: Development of  
657 methods and feasibility of using hyperpolarized carbon-13 imaging data for evaluating  
658 brain metabolism in patient studies. *Magn Reson Med* 2018;80:864-873.
- 659 Pei H, Li L, Fridley BL, Jenkins GD, Kalari KR, Lingle W, Petersen G, Lou Z, Wang L: FKBP51  
660 affects cancer cell response to chemotherapy by negatively regulating Akt. *Cancer Cell*  
661 2009;16:259-266.
- 662 Peng X, Chen Z, Farshidfar F, Xu X, Lorenzi PL, Wang Y, Cheng F, Tan L, Mojumdar K, Du  
663 D, Ge Z, Li J, Thomas GV, Birsoy K, Liu L, Zhang H, Zhao Z, Marchand C, Weinstein  
664 JN, Cancer Genome Atlas Research N, Bathe OF, Liang H: Molecular Characterization  
665 and Clinical Relevance of Metabolic Expression Subtypes in Human Cancers. *Cell Rep*  
666 2018;23:255-269 e254.
- 667 Pol A, Gross SP, Parton RG: Review: biogenesis of the multifunctional lipid droplet: lipids,  
668 proteins, and sites. *J Cell Biol* 2014;204:635-646.
- 669 Rohrig F, Schulze A: The multifaceted roles of fatty acid synthesis in cancer. *Nat Rev Cancer*  
670 2016;16:732-749.
- 671 Semenza GL: Defining the role of hypoxia-inducible factor 1 in cancer biology and  
672 therapeutics. *Oncogene* 2010;29:625-634.
- 673 Son J, Lyssiotis CA, Ying H, Wang X, Hua S, Ligorio M, Perera RM, Ferrone CR, Mullarky E,  
674 Shyh-Chang N, Kang Y, Fleming JB, Bardeesy N, Asara JM, Haigis MC, DePinho RA,  
675 Cantley LC, Kimmelman AC: Glutamine supports pancreatic cancer growth through a  
676 KRAS-regulated metabolic pathway. *Nature* 2013;496:101-105.
- 677 Tang Y, Zhou J, Hooi SC, Jiang YM, Lu GD: Fatty acid activation in carcinogenesis and cancer  
678 development: Essential roles of long-chain acyl-CoA synthetases. *Oncol Lett*  
679 2018;16:1390-1396.
- 680 Waddell N, Pajic M, Patch AM, Chang DK, Kassahn KS, Bailey P, Johns AL, Miller D, Nones  
681 K, Quek K, Quinn MC, Robertson AJ, Fadlullah MZ, Bruxner TJ, Christ AN, Harliwong  
682 I, Idrisoglu S, Manning S, Nourse C, Nourbakhsh E, Wani S, Wilson PJ, Markham E,  
683 Cloonan N, Anderson MJ, Fink JL, Holmes O, Kazakoff SH, Leonard C, Newell F,  
684 Poudel B, Song S, Taylor D, Waddell N, Wood S, Xu Q, Wu J, Pinese M, Cowley MJ,  
685 Lee HC, Jones MD, Nagrial AM, Humphris J, Chantrill LA, Chin V, Steinmann AM,  
686 Mawson A, Humphrey ES, Colvin EK, Chou A, Scarlett CJ, Pinho AV, Giry-Laterriere  
687 M, Rooman I, Samra JS, Kench JG, Pettitt JA, Merrett ND, Toon C, Epari K, Nguyen  
688 NQ, Barbour A, Zeps N, Jamieson NB, Graham JS, Niclou SP, Bjerkvig R, Grutzmann  
689 R, Aust D, Hruban RH, Maitra A, Iacobuzio-Donahue CA, Wolfgang CL, Morgan RA,  
690 Lawlor RT, Corbo V, Bassi C, Falconi M, Zamboni G, Tortora G, Tempero MA,  
691 Australian Pancreatic Cancer Genome I, Gill AJ, Eshleman JR, Pilarsky C, Scarpa A,  
692 Musgrove EA, Pearson JV, Biankin AV, Grimmond SM: Whole genomes redefine the  
693 mutational landscape of pancreatic cancer. *Nature* 2015;518:495-501.
- 694 Weidlich D, Honecker J, Gmach O, Wu M, Burgkart R, Ruschke S, Franz D, Menze BH, Skurk  
695 T, Hauner H, Kulozik U, Karampinos DC: Measuring large lipid droplet sizes by probing

696 restricted lipid diffusion effects with diffusion-weighted MRS at 3T. Magn Reson Med  
697 2019;81:3427-3439.  
698

699

700

701

702

703

704

705

706

707

708

709

710

711

712

713

714

715

716

717

718

719

720

721

722

723

724

725

726

727

728

729

730

731

732

733

734 **Figures and figure legends:**

735

736 **Figure 1:**

737

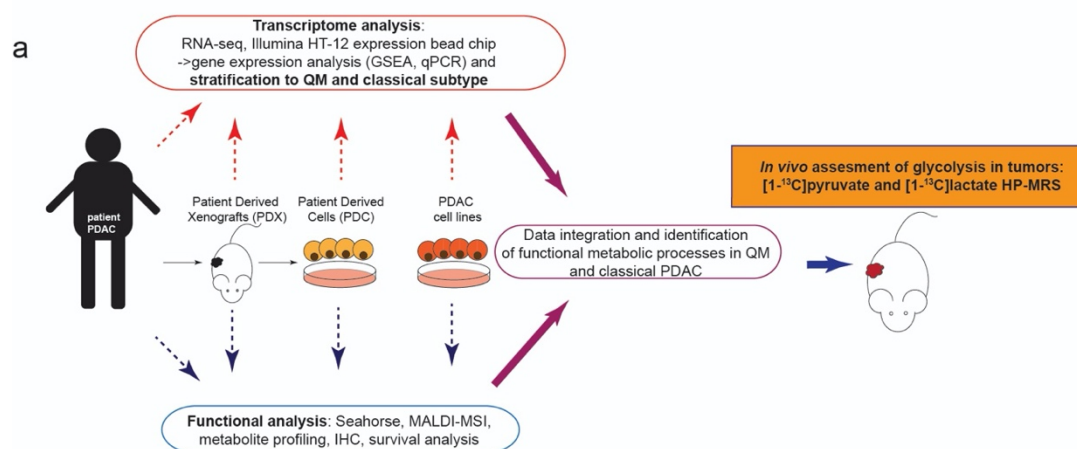

**b** patient cohort (n=204, 88 classical, 116 QM)

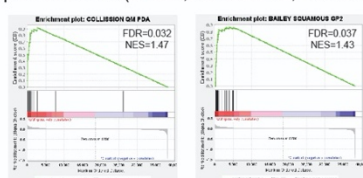

**c**

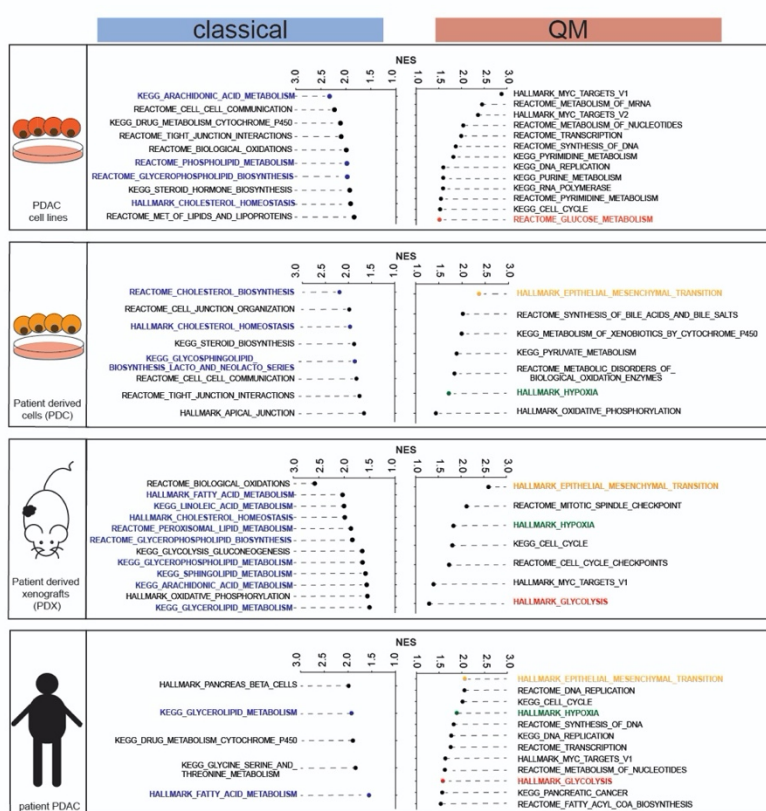

**d**

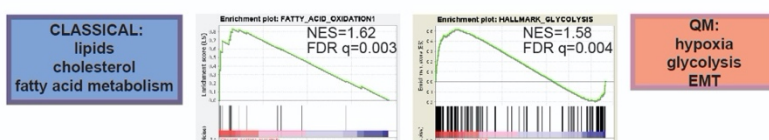

738

739 **Figure 1: Gene Set Enrichment Analysis (GSEA) identifies glycolysis, hypoxia and**  
740 **lipid/fatty acid metabolism are enriched in QM and classical PDAC samples**  
741 **respectively**

742 a) Graphical sketch of the used models and experimental flow in the study.  
743 b) Enrichment plots for the selected “Collisson QM” and “Bailey squamous GP2” assigner  
744 gene sets in our patient cohort. Both gene sets are enriched in here defined QM PDAC  
745 samples. FDR and NES presented in the figure.  
746 c) GSEA analysis for QM vs classical groups was performed for cell lines (n=8; 4QM, 4  
747 classical), Patient Derived Cells (PDC; n=11, 5 QM and 6 classical) Patient Derived  
748 Xenografts (PDX; n=34, 12 QM and 22 classical), and patient PDAC samples (n=204; 116  
749 QM, 88 classical). Presented are Normalized Enrichment Scores (NES) values for selection  
750 of metabolic gene sets identified as significantly enriched (False Discovery Rate, FDR q  
751 value <0.06) in QM or classical subtypes. Gene set databases HALLMARK, REACTOME  
752 and KEGG were used for analysis. Epithelial-to-mesenchymal transition (EMT, blue),  
753 glycolysis/glucose metabolism (orange), hypoxia (green) and MYC targets gene sets are  
754 commonly enriched in most of the QM datasets. In classical subtype, gene sets typical for  
755 cellular organization (tight junctions, cell-cell communication) together with  
756 lipid/cholesterol/fatty acid metabolism (dark blue) are enriched. d) Enrichment plots for Fatty  
757 Acid Oxidation (FAO) generated gene set and HALLMARK glycolysis gene set specifically  
758 enriched in classical and QM PDAC patient samples respectively.

759  
760  
761  
762  
763  
764  
765  
766  
767  
768  
769  
770  
771  
772  
773  
774  
775

776 **Figure 2:**

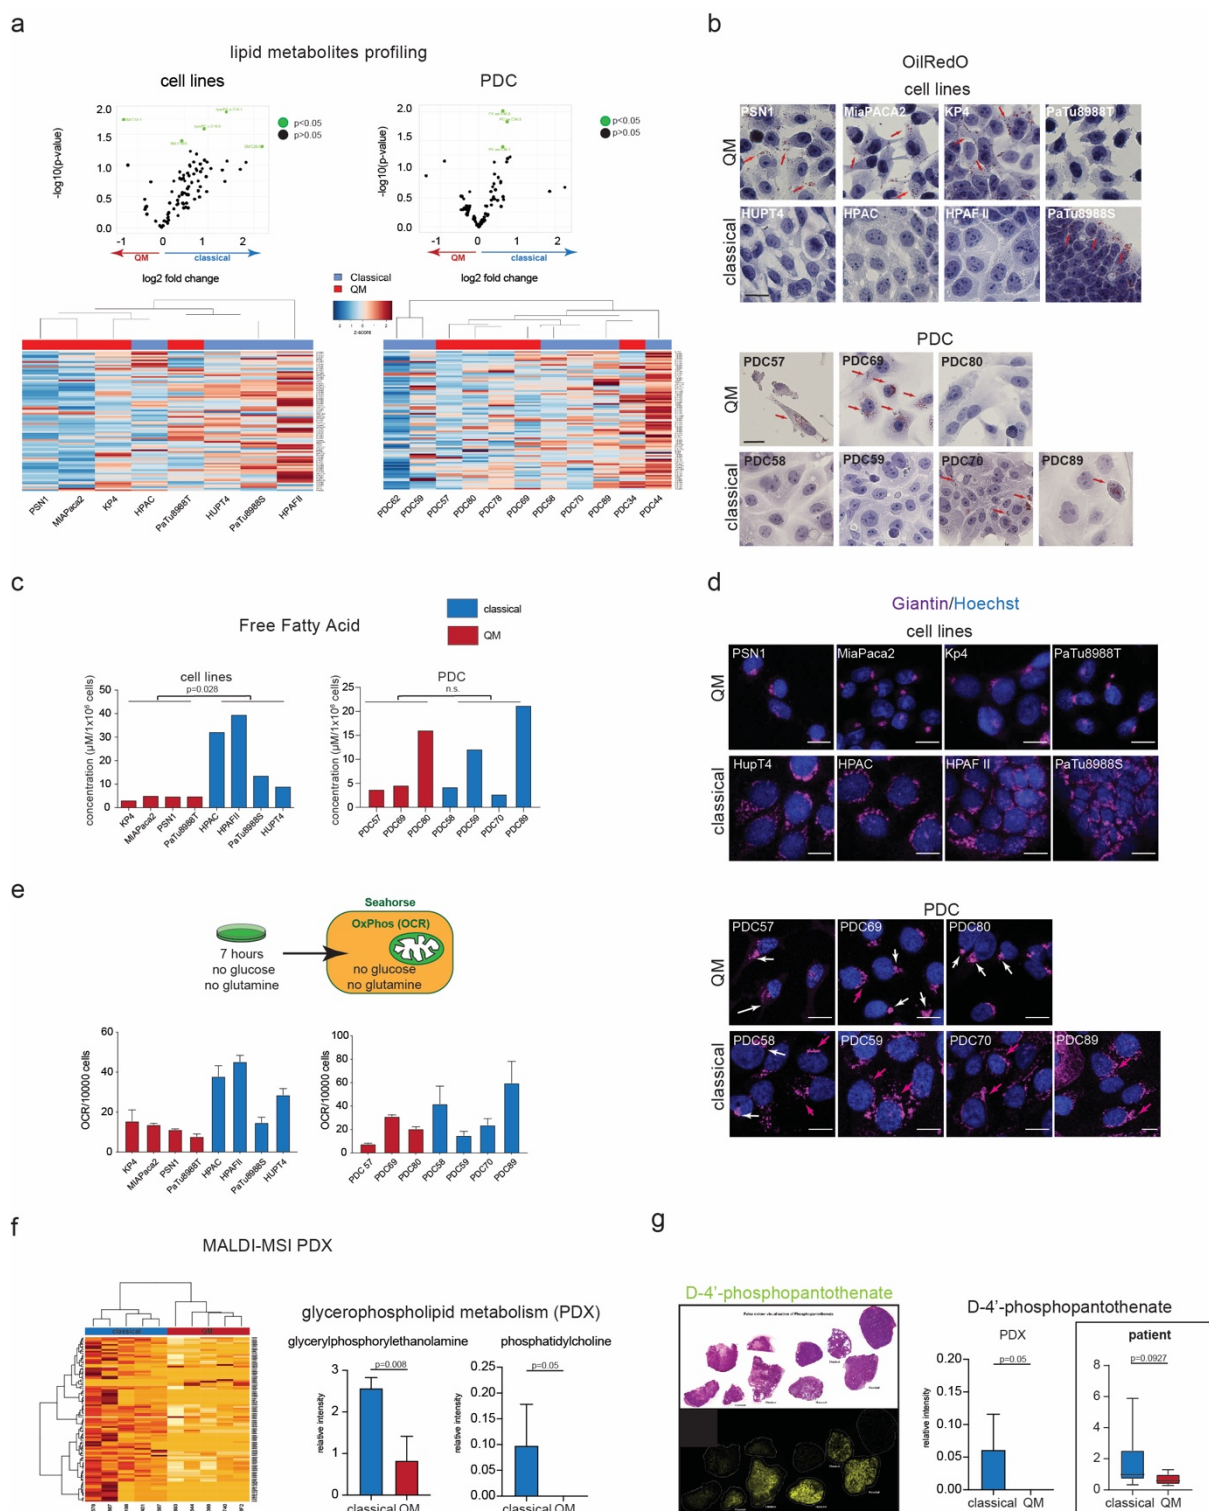

777  
 778 **Figure 2: Differences in lipid metabolism in QM and classical PDACs**  
 779 a) Volcano plots and hierarchical clustering for lipid metabolites, PC-phosphatidylcholines,  
 780 LPC-lysophosphatidylcholines and SM-sphingomyelins in the QM and classical PDAC cell  
 781 lines and PDCs as measured by Biocrates Absolute p180 kit. Upper panel: Volcano plots  
 782 showing general enrichment of lipid metabolites in classical cell lines. This effect was present  
 783 but less pronounced in PDCs. One dot presents one metabolite. Green dots present



784 significantly changed metabolites between classical and QM subtype with  $p < 0.05$  (Student's  
785 T-test, unpaired, two-sided). Full list of metabolites, measured concentrations and  
786 abbreviations is given in supplementary table 4. Lower panels: hierarchical clustering of all  
787 analyzed structural lipid metabolites according to their measured concentrations in PDAC cell  
788 lines (84 metabolites) and PDCs (85 metabolites). Z score: red color indicates high, blue low  
789 intensity; b) OilRedO staining for lipid droplets in PDAC cells. Accumulation of lipid droplets  
790 observed in QM cell lines PSN1, MIAPaCa2, Kp4, in PDC69 and occasionally in PDC57.  
791 Among classical cell lines PaTu8988S was very rich in lipid droplets while in HPAFII, HPAC  
792 and HUPT4 cells lipid droplets were not detected. Classical PDC70 readily presented OilRed  
793 positive cells as well, while in PDC89 only very occasional single cells were positive. In  
794 classical PDC58, PDC59 lipid droplets were not detected. Red arrows indicate lipid droplets.  
795 Scale bar=10 $\mu$ m. c) Higher free fatty acid (FFA) in classical than in QM cell lines. PDC89  
796 (classical) presents the highest level of FFA among PDCs. P-values calculated by the Mann-  
797 Whitney test. d) Immunofluorescence for Giantin, a Golgi membrane protein. Compact Golgi  
798 observed in QM cell lines PSN1, MIAPaca2, KP4, PaTu8988T and primary QM PDC57 and  
799 PDC80 cells. Disperse Golgi in classical lines HPAFII, HPAC, HUPT4, PaTu8988S and  
800 classical PDC59, PDC70, PDC89. Mixed Golgi structures with predominantly compact  
801 morphology observed in PDC69 (QM) and PDC58 (classical). Compact Golgi-white arrows.  
802 Disperse Golgi-red arrows. Scale bar 10 $\mu$ m. e) OCR levels measured for cell lines and PDCs  
803 after 7 hours of cultivation in media without glucose or glutamine. HPAC, HPAFII, HUPT4  
804 and PDC89 present high relative OCR levels suggesting oxidation of endogenous fatty acid.  
805 Presented are OCR values (mean $\pm$ SD) calculated from 2-3 wells/cell line/per 10.000 seeded  
806 cells in one experiment. f) MALDI-MSI and m/z species clustering for classical (n=5) and QM  
807 (n=5) PDX samples. Left: hierarchical clustering of differentially expressed m/z species in  
808 PDX samples. Significantly changed m/z species (Mann-Whitney test) were included in the  
809 clustering. Red color-high intensity; Light yellow-low intensity; Metabolites of  
810 glycerophospholipid metabolism, glycerylphosphorylethanolamine (m/z=214.049) and  
811 phosphatidylcholine (m/z=794.509) are significantly higher in the classical PDX samples. P-  
812 values calculated by Mann-Whitney test. g) H&E and false color visualization of D-4'-  
813 phosphopantothenate (m/z=280.0595) in cryo-sections of PDX samples. D-4'-  
814 phosphopantothenate is detected exclusively in classical PDX. D-4'- phosphopantothenate is  
815 detected exclusively in classical PDX. Framed graph : D-4'- phosphopantothenate is also  
816 prominently enriched in the human classical FFPE samples as well (classical n=9, QM n= 8).  
817 P-values calculated by Mann-Whitney test.

818  
819  
820

821

822 **Figure 3:**

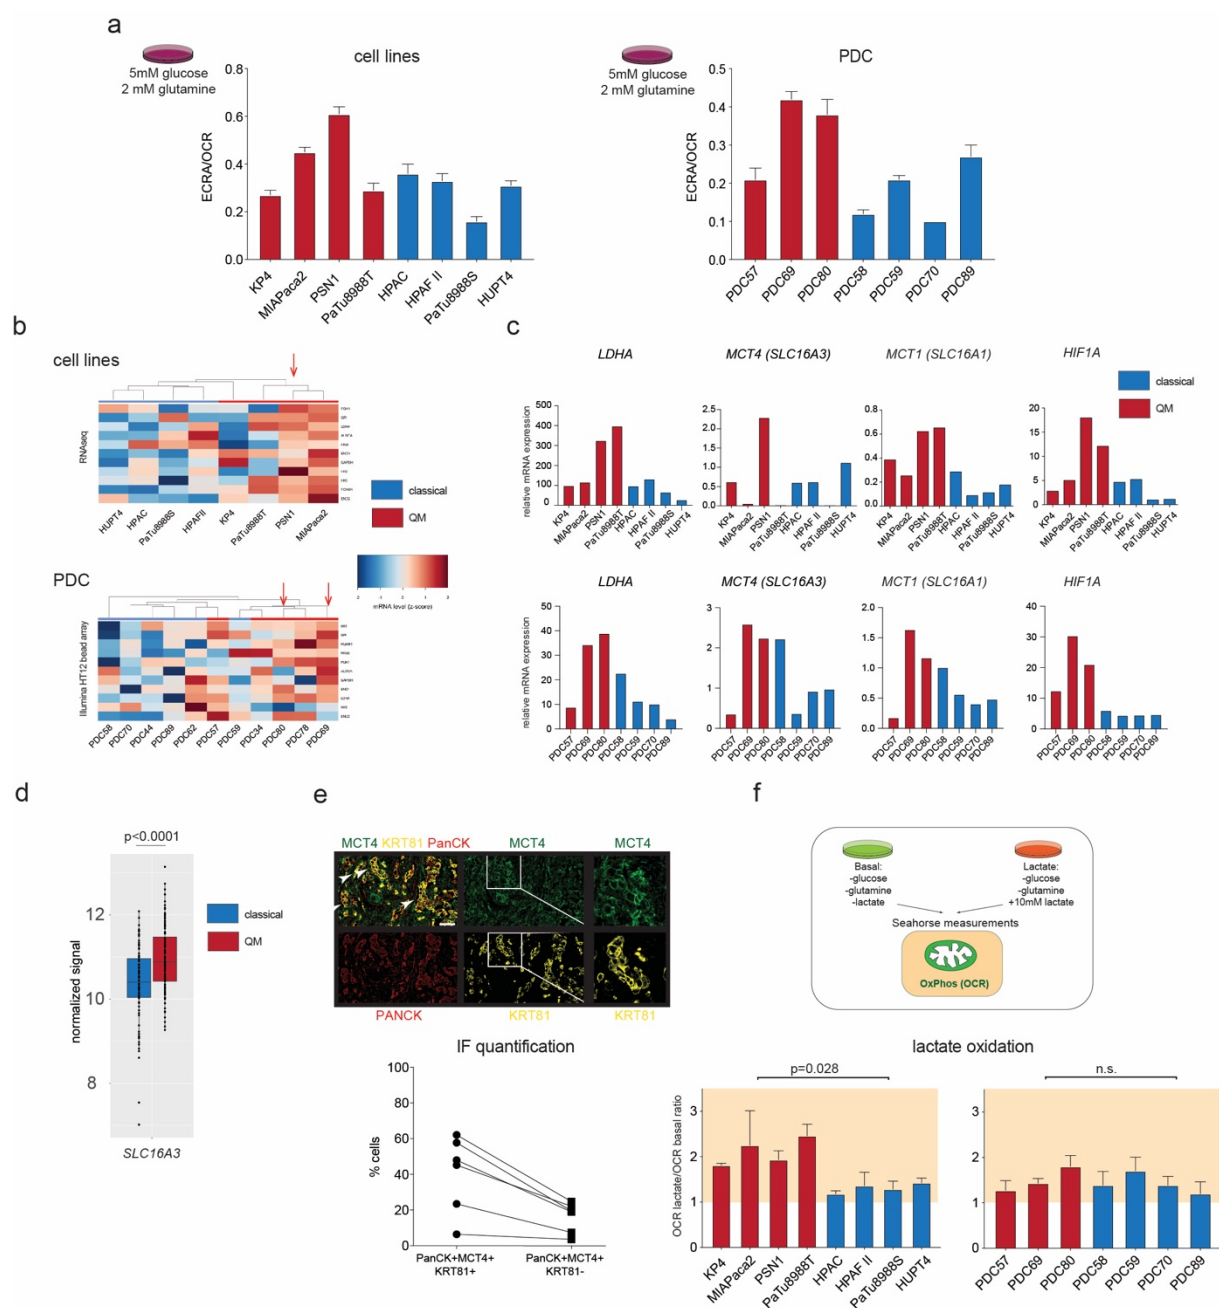

823

824 **Figure 3: Glycolysis evaluation in PDAC.**

825 a) ECAR to OCR ratios (ECAR/OCR) as measured by seahorse metabolic flux assay for  
 826 PDAC cell lines (left) and PDCs (right) cultivated in medium supplemented with 5mM glucose  
 827 (physiological concentration) and 2mM glutamine. Higher ECAR/OCR ratio indicates higher  
 828 glycolysis under these conditions. Presented are mean±SD values calculated for minimum of  
 829 4 wells/cell line in one experiment. b) Hierarchical clustering analysis for glycolytic genes  
 830 using gene expression data for cell lines (RNA-seq) and PDCs (HT12 Illumina bead assay).  
 831 Z-score: red color-high expression, blue color-low expression. PSN1, PDC69 and PDC80  
 832 show high expression of all investigated glycolytic genes. c) qPCR for LDHA, MCT1

833 (*SLC16A1*), MCT4 (*SLC16A3*) and *HIF1a* in the established and primary cells. Highest gene  
834 expression levels observed in PSN1, PDC69 and PDC80 (all QM) among cell lines and  
835 PDCs respectively. Beta-glucuronidase (*GUSB*) expression was used as house-keeper  
836 control. d) *SLC16A3* gene expression is higher in QM than in classical in patient PDAC  
837 samples. P value calculated by Student's T-Test (unpaired, two sided). e) Multiplexed  
838 immunofluorescence staining of MCT4 (glycolysis marker), cytokeratin 81(KRT81-QM  
839 marker) and pan-cytokeratin (cancer cell marker) on 6 patient PDAC FFPE samples. White  
840 arrows indicate overlapping MCT4 and KRT81 signals. Scale bar: 10 $\mu$ m. Lower graph:  
841 quantification of respective populations in 6 PDAC samples by Halo. Around 30-50% of  
842 KRT81 positive cancer cells are also MCT4 positive; among KRT81 negative cancer cells,  
843 less than 20% are also positive for MCT4. Populations determined in the same sample, one  
844 line indicates one patient. f) Upper panel: schematic representation of the performed  
845 seahorse assay. Cells were cultivated in "basal" medium (no glucose, no glutamine) or in  
846 "basal" media supplemented with 10mM Sodium-L-Lactate ("basal+lactate") for 7 hours in  
847 total and OCR levels are measured. Ratios among OCR values measured for "basal+lactate"  
848 and "basal" only media are calculated and presented. Ratio above 1 indicates increase in  
849 OCR due to lactate application. Presented are mean values of minimum 2 independent  
850 experiments (mean $\pm$ SD). P values calculated by the Mann-Whitney test for QM vs classical  
851 cells.  
852

853 **Figure 4:**

a

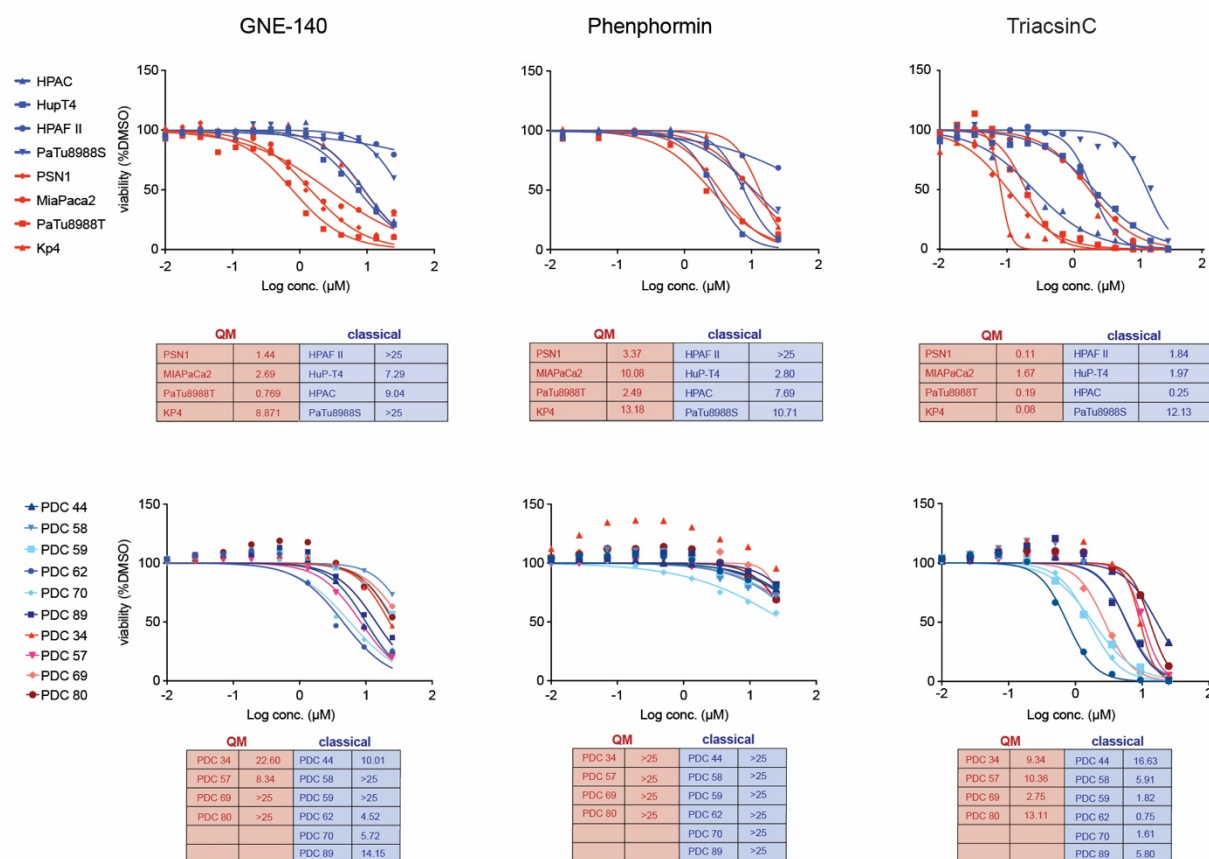

854

855

856 **Figure 4: PDAC cells show differential response to metabolic inhibitors**

857 Dose response curves of cell lines and PDCs to glycolysis inhibitor GNE-140, OxPhos  
 858 inhibitor Phenphormin and lipid metabolism inhibitor TriacsinC. IC50 values are presented in  
 859 tables, micromolar values (µM). Blue-classical cells, red-QM cells. GNE-140 inhibitory effects  
 860 are stronger in QM than in classical PDAC cell lines. Effects in PDC lines are subtype  
 861 independent. Phenphormin and TriacsinC do not show subtype specific effects in cell lines or  
 862 PDCs. Presented are mean dose response curves and IC50 values of 2 independent  
 863 experiments.

864

865

866

867

868

869

870

871

872

873 **Figure 5:**

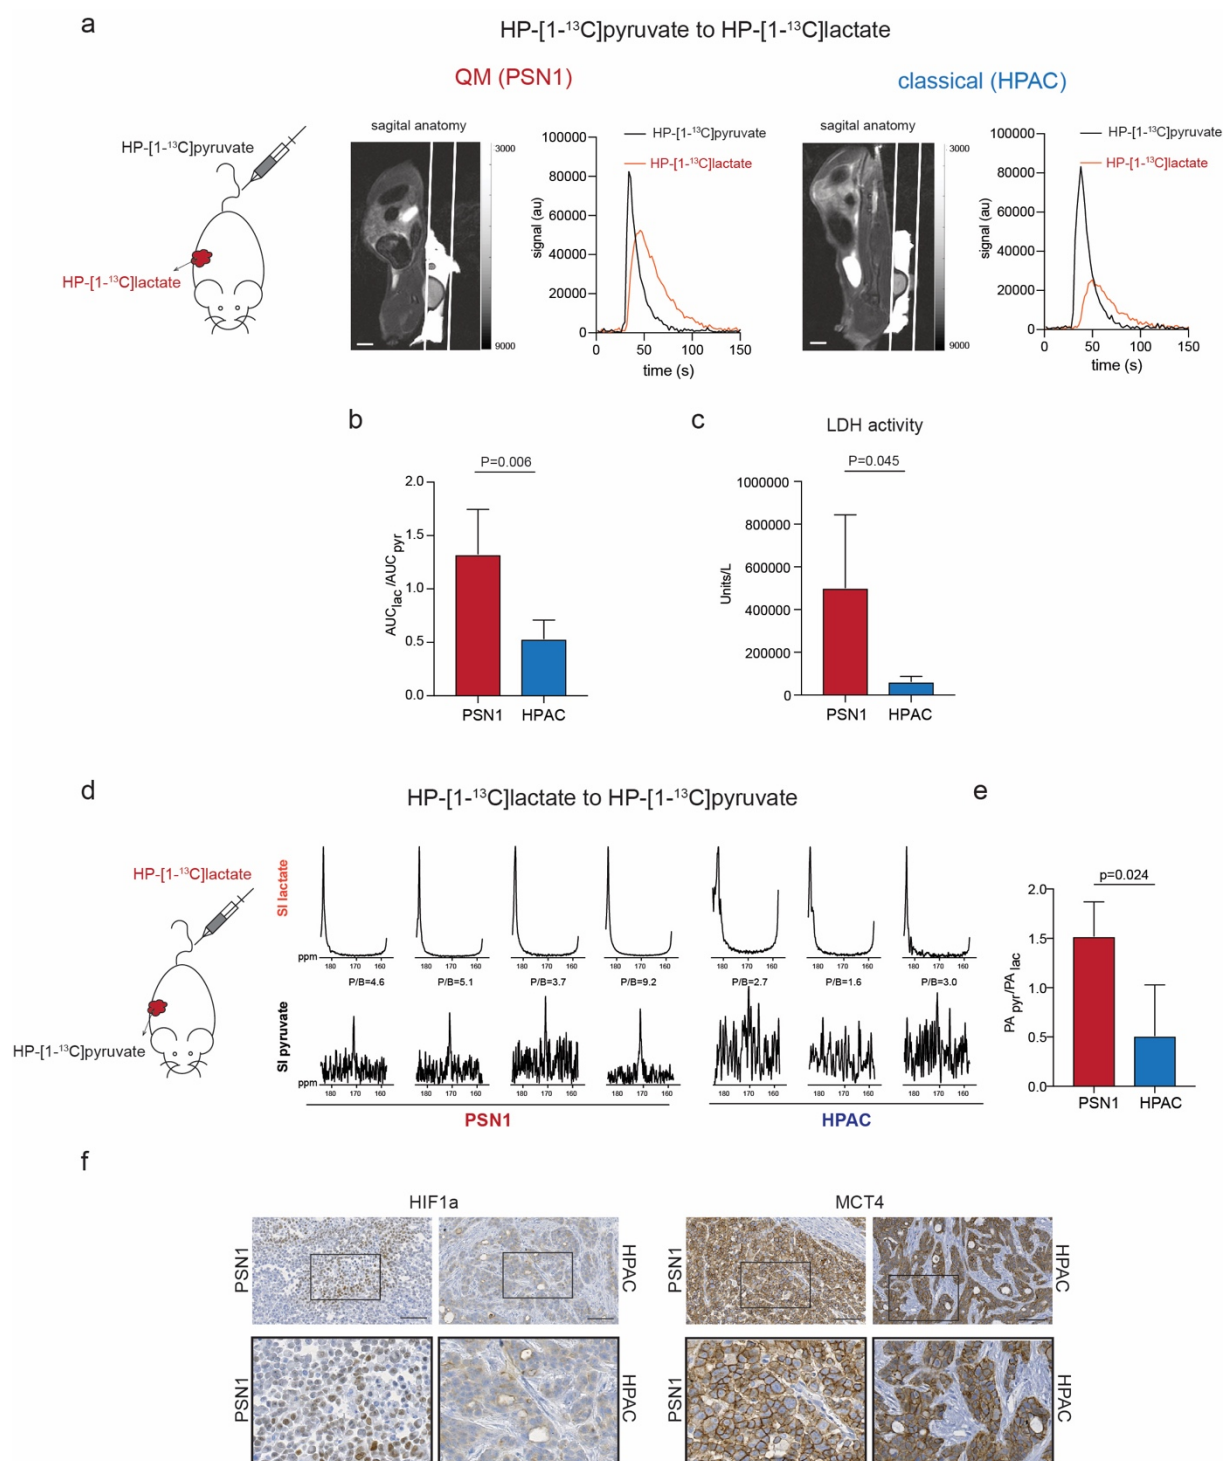

874

875

876 **Figure 5: Magnetic resonance spectroscopy (MRS) of HP-[1-<sup>13</sup>C]pyruvate and HP-[1-**  
 877 **<sup>13</sup>C]lactate inter-conversions in PSN1 (QM) and HPAC (classical) PDAC xenografts in**  
 878 **rats.**

879 a) Left to right: schematic presentation of HP-[1-<sup>13</sup>C]pyruvate i.v. injection into rats with  
 880 xenotransplanted PSN1 and HPAC tumors, T2-weighted sagittal anatomy image (scale  
 881 bar=1cm) of a rat bearing a subcutaneous tumor and graphs demonstrating signal intensity

882 time courses of HP-[1-<sup>13</sup>C]pyruvate and HP-[1-<sup>13</sup>C]lactate measured intratumorally in PSN1  
883 (left) and HPAC (right) rat xenografts. The HP-[1-<sup>13</sup>C]lactate curve (red) is higher for PSN1  
884 than for HPAC xenografts. b) Calculated relative AUC ratios of HP-[1-<sup>13</sup>C]lactate to perfused  
885 HP-[1-<sup>13</sup>C]pyruvate showing higher conversion rate in PSN1 (n=4;  $1.325 \pm 0.418$ ) than in  
886 HPAC tumors (n=5;  $0.5349 \pm 0.175$ ). P=0.006. c) *Ex vivo* measurements of lactate  
887 dehydrogenase activity in imaged tumor sample. Higher activity in PSN1 (n=5;  $501794 \pm$   
888  $341920$  U/L) than in HPAC tumors (n=5;  $62796 \pm 24641$  U/L) detected. P=0.045. d) Left to  
889 right: schematic presentation of HP-[1-<sup>13</sup>C]lactate injected into rats with xenotransplanted  
890 PSN1 and HPAC tumors, signal Intensity (SI) spectra of perfused HP-[1-<sup>13</sup>C]lactate (top) and  
891 detected HP-[1-<sup>13</sup>C]pyruvate (bottom) for PSN1 (n=4) and HPAC (n=3) tumors The spectra  
892 have been summed over 10 time points covering maximum tumor enhancement and  
893 normalized to the lactate signal. Higher peak to background ratios (P/B 3.7-9.2) were  
894 observed in PSN1 tumors in comparison to P/B ratios in HPAC tumors (P/B 1.6- 3.0). e)  
895 Signal intensity quantification: PApyr/PAlac ratios are significantly higher in PSN1 ( $1.49 \pm$   
896  $0.30$ , n=4) than in classical tumors ( $0.51 \pm 0.51$ , n=3). P=0.024. PA-peak area. All P-values in  
897 this figure calculated by Student's T-test (unpaired, two-sided). f) Immunohistochemistry for  
898 HIF1a and MCT4 in rat xenografts. HIF1A specific nuclear staining detected exclusively in  
899 PSN1 (QM) tumors. Scale bar=100 $\mu$ M.

900

901

902
